# Supplementary material
Source: Research Square preprint supplement (doi:10.21203/rs.3.rs-9560827/v1)
Supplement: Supplementary file 3 [file 837c40305c6ce0a0ddfdca5d.docx]

**SUPPLEMENTAL INFORMATION**

Supplemental Information includes eight Figures and four Tables and is available online with this article.
